19 **Abstract**

20 **Background:** To establish the clinical breakpoint (CBP) of danofloxacin to *G.*  
21 *parasuis*, three cutoff values, including epidemiological cutoff value (ECV),  
22 pharmacodynamic cutoff value (CO<sub>PD</sub>) and clinical cutoff value (CO<sub>CL</sub>), was obtained  
23 in the present study.

24 **Methods:** The ECV was calculated using ECOFFinder base on MIC distribution of  
25 347 *G. parasuis* collected from disease pigs. The CO<sub>PD</sub> was established base on *in*  
26 *vivo* and *ex vivo* pharmacokinetic (PK) - pharmacodynamic (PD) modeling of  
27 danofloxacin both in plasma and pulmonary epithelial lining fluid (PELF) using Hill  
28 formula and Monte Carlo analysis. The CO<sub>CL</sub> was established based on the  
29 relationship between possibility of cure (POC) and MIC in the clinical trials using  
30 “Window” approach, nonlinear regression and CART analysis.

31 **Results:** The MIC<sub>50</sub> and MIC<sub>90</sub> of danofloxacin against 347 *G. parasuis* were 2  
32 µg/mL and 8 µg/mL, respectively. The ECV value was set up as 8 µg/mL using  
33 ECOFFinder. Concentration-time curve of danofloxacin indicated a two-compartment  
34 model for PK analysis. The PK parameters of the maximum concentration (C<sub>max</sub>) and  
35 area under concentration-time curve (AUC) in PELF were 3.67 ± 0.25 µg/mL and  
36 24.28 ± 2.70 h·µg/mL, higher than those in plasma (0.67 ± 0.01µg/mL and 4.47 ±  
37 0.51 h·µg/mL). The peak time (T<sub>max</sub>) in plasma was 0.23 ± 0.07 h, shorter than that in  
38 PELF (1.61 ± 0.15 h). The CO<sub>PD</sub> in plasma and PELF were 0.125 µg/mL and 0.5  
39 µg/mL, respectively. The CO<sub>CL</sub> calculated by Window approach, nonlinear regression  
40 and CART analysis were 0.125~4 µg/mL, 0.428 µg/mL and 0.56 µg/mL, respectively.  
41 The 0.5 µg/mL was selected as eligible CO<sub>CL</sub>. The ECV is much higher than the CO<sub>PD</sub>  
42 and CO<sub>CL</sub>, and the clinical breakpoint based on data in plasma was large different  
43 with that of in PELF.

44 **Conclusions:** Our study firstly established three cutoff values of danofloxacin against  
45 *G. parasuis*. It suggested that epidemiological danofloxacin-resistant *G. parasuis* may  
46 lead to the ineffective treatment by danofloxacin.

47 **Importance:** *G. parasuis*, a gram-negative respiratory pathogen, can colonize in the  
48 upper respiratory tract in swine and cause Glasser's disease. As the abuse of

49 antibiotics, antimicrobial resistant *G. parasuis* emerged in different degrees, which  
50 brought serious threat to global economy and public health. Danofloxacin in  
51 quinolones are one of the best choices for treatment of *G. parasuis* infection, because  
52 of their strong bactericidal activity and good absorption into blood and great  
53 distribution in the lung. However, the clinical breakpoint (CBP) for danofloxacin  
54 against *G. parasuis* had not yet been established by clinical laboratory of standard  
55 Institute (CLSI) and European Commission of antimicrobial susceptibility testing  
56 (EUCAST). Our study firstly established three cutoff values of danofloxacin against  
57 *G. parasuis*. It suggested that epidemiological danofloxacin-resistant *G. parasuis* may  
58 lead to the ineffective treatment by danofloxacin.

59 **Keywords:** Danofloxacin; *Glaesserella parasuis*; epidemiological cut-off values;  
60 pharmacodynamics cutoff; clinical cutoff; clinical breakpoint

61

## 62 **1 Introduction**

63 *Glaesserella parasuis*, a gram-negative respiratory pathogen, can colonize in the  
64 upper respiratory tract in swine and cause Glasser's disease like fibrinous polyserositis,  
65 arthritis, meningitis and pneumonia(Oliveira and Pijoan, 2004). The serotype 1, 5, 10,  
66 12, 13 and 14 exhibited higher virulence and pathogenicity(Kielstein and  
67 Rapp-Gabrielson, 1992). The serotype 5 and 4 were dominant in China(Cai et al.,  
68 2005). As the abuse of antibiotics, antimicrobial resistant *G. parasuis* emerged in  
69 different degrees, which brought serious threat to global economy and public  
70 health(Nedbalcova et al., 2017).

71 Quinolones are one of the best choices for treatment of *G. parasuis* infection,  
72 because of their strong bactericidal activity and good absorption into blood and great  
73 distribution in the lung(Drlica and Zhao, 1997). Danofloxacin, one of the most  
74 important fluoroquinolones, has broad spectrum of antimicrobial activity and has been  
75 widely used in different animals, like in sheep(Aliabadi et al., 2003), honey(Cherif et  
76 al., 2015), rabbits(Fernandez-Varon et al., 2007), turkeys(Haritova et al., 2006), cattle  
77 and swine(Mann and Frame, 1992). However, the clinical breakpoint (CBP) for  
78 danofloxacin against *G. parasuis* had not yet been established by clinical laboratory  
79 of standard Institute (CLSI) and European Commission of antimicrobial susceptibility  
80 testing (EUCAST).

81 The CBP was set on the basis of epidemiological cutoff values (ECV) or  
82 wide-type cutoff ( $CO_{WT}$ ), pharmacodynamics (PD) cutoff values ( $CO_{PD}$ ) and clinical  
83 cutoff values ( $CO_{CL}$ )(Toutain et al., 2017). For a given microbial species and  
84 antimicrobial agent, the ECVs were the upper bound of the wild-type MIC  
85 distribution for organisms without detectable acquired resistance mechanisms and can  
86 be calculated by nonlinear regression analysis using ECOFFinder software (Canton et  
87 al., 2012; Kronvall, 2010; Turnidge et al., 2006).  $CO_{PD}$  considered the  
88 pharmacokinetics-pharmacodynamic (PK-PD) parameters of special antimicrobial  
89 agent in target animals and determined by Monte Carlo simulation to find the MIC  
90 with 90% possibility reaching to the PK-PD target (Rey et al., 2014).  $CO_{CL}$  was

91 decided based on the relationship between clinical outcomes and antimicrobial  
92 susceptibility using several statistical approaches (Turnidge and Martinez, 2017). The  
93 present study was aimed to establish the ECV, CO<sub>PD</sub> and CO<sub>CL</sub> values for decision of  
94 the final CBP of danofloxacin against *G. parasuis* and evaluation of the efficiency of  
95 danofloxacin for treatment of *G. parasuis*.

## 96 **2 Materials and Methods**

### 97 **2.1 Strains**

98 From March to May in 2017, a total of 347 *G. parasuis* strains were collected  
99 from disease animals. 35 *G. parasuis* strains were isolated from pig lungs provided by  
100 Keqian clinical diagnostic center; 8 *G. parasuis* strains were donated by Xiaojuan Xu  
101 from State Key Laboratory of Agricultural Microbiology in Huazhong Agricultural  
102 University; 204 *G. parasuis* strains were isolated from disease pigs by Peng Zhang in  
103 China Agricultural University; and 100 *G. parasuis* strains were stored in National  
104 Reference Laboratory of Veterinary Drug Residues. All these strains were isolated  
105 from the lungs and pericardium of weak or moribund pigs showing respiratory  
106 distress or arthritis in different provinces of China. All bacterial isolates were  
107 confirmed by PCR amplification of 16s rRNA(Oliveira et al., 2001). *E.coli*  
108 (ATCC25922) was used as the quality control (QC) which reserved by National  
109 Reference Laboratory of Veterinary Drug Residues.

### 110 **2.2 Animals**

111 78 six-weeks-old healthy crossbred (Duroc × Large × white × Landrace) pigs  
112 weighing 20 kg were purchased from Huazhong Agricultural University pig breeding  
113 farm. Prior to experiments, pigs were raised 7 days to acclimate. All the animal  
114 experiments were approved by the Animal Ethics Committee of Huazhong  
115 Agricultural University (hzauch 2014-003) and the Animal Care Center, Hubei  
116 Science and Technology Agency in China (SYXK2013–0044). All efforts were used  
117 to reduce the pain and adverse effect of the animals.

## 118 **2.3 Establishment of ECV**

119 Susceptibility testing was performed by agar dilution method according to CLSI  
120 M07-A9 standard with some modification. A 2  $\mu$ L *G. parasuis* suspension ( $10^7$   
121 CFU/mL) was inoculated onto TSA-FCS-NAD agar plates containing two fold  
122 dilutions (0.0075.....64  $\mu$ g/mL) of danofloxacin (Dr. Ehrenstorfer Standards,  
123 Augsburg, Germany). The MICs were converted to  $\text{Log}_2\text{MIC}$ , ECV was simulated  
124 using ECOFFinder software (Espinel-Ingroff et al., 2018). ECV at 95%, 97.5%, 99%,  
125 99.5% and 99% confidence intervals were simulated.

## 126 **2.4 Establishment of $\text{CO}_{\text{PD}}$ based on PK- PD modeling**

### 127 **2.4.1 Selection of pathogenic *G. parasuis***

128 The serotype of 81 strains with MIC same and higher than  $\text{MIC}_{90}$  were  
129 determined by ERIC-PCR using ERIC primer (5'-ATG TAA GCT CCT GGG GAT  
130 TCA C-3' and 5'-AAG TAA GTG ACT GGG GTG AGC G-3') following previous  
131 study (Rafiee et al., 2000; Versalovic et al., 1991). SH 0165 (serotype 5) was positive  
132 control.

133 The 18 strains with serotype 5 were selected to pathogenicity test on mouse. 16 ~  
134 20 g healthy Balb/c mice were divided randomly into 19 groups (5 mice/group) with  
135 one black control group.  $1 \times 10^9$  cfu bacterium was inoculated by abdominal cavity  
136 injection, the control group injected with TSB broth. Mice were monitored daily for 7  
137 days post-inoculation (dpi). The pathogenicity of *G. parasuis* was compared based on  
138 survival time (Yu et al., 2016).

### 139 **2.4.2 Pharmacodynamics *in vitro* and *ex-vivo***

140 The MIC and MBC of *G. parasuis* H80 in broth and pulmonary epithelial lining  
141 fluid (PELF) were determined using broth dilution method according to the CLSI  
142 M07-A9 standard with some modification.

143 The *in vitro* and *ex-vivo* killing curve of danofloxacin in broth and in PELF was  
144 drawn by monitoring the Colony formed unite (CFU) changes during the incubation  
145 of *G. parasuis* H80 under a series concentration of danofloxacin (1/2 to 32 MIC) for  
146 continuous time (0, 1, 2, 4, 6, 8, 12 and 24 h).

### 147 **2.4.3 Animal experiment and sample collection for Pharmacokinetics study**

148 Danofloxacin was administrated to twelve pigs at a single-dose of 2.5 mg/kg b.w.  
149 by intramuscular injection. After administration, 2 mL blood samples were obtained  
150 at 0, 0.08, 0.17, 0.25, 0.5, 0.75, 1, 1.5, 2, 3, 4, 6, 8, 10, 12, 24, 36, 48 h. Plasma was  
151 separated from blood by centrifugation at 3500r/min for 10min.

152 To collect PELF samples, atropine (0.05 mg/kg) and propofol (9~15 mg/kg)  
153 were given intramuscularly and intravenously 30 min for anesthesia. Standardized  
154 Bronchoaveolar Lavage (BAL) was performed as previously described(Giguere et al.,  
155 2011; Zhang et al., 2015), with an electronic fiber opticbron choscope  
156 (KangmeiGU-180VET) inserted in the right middle lung lobe. The 50mL of normal  
157 saline was instilled into the lobe, and was aspirated into a 50mL centrifugal tube . The  
158 PELF samples were collected at 0, 0.5, 1, 1.5, 2, 4, 6, 8, 10, 12, 24, 36, 48 h. The  
159 PELF was centrifuged at 800 r/min for 10 min.

### 160 **2.4.4 Quantitation analysis of danofloxacin by HPLC**

161 Quantitation analysis of danofloxacin in PELF and plasma were conducted using  
162 high performance liquid chromatography (HPLC). Agent SB-Aq reverse-phase  
163 column (250 mm, 4.6 mm i.d., 5 mm; Agilent) was used to perform HPLC at 30°C.  
164 The detection wave length was 280nm. The mobile phase consisted of 0.05%  
165 phosphoric acid (phase A) and acetonitrile (phase B) with gradient elute.  
166 0.5mLPlasma and 0.5 mL PELF were extracted with 2mL acetonitrile twice.

167 The urea dilution method was used to determine the volume of PELF as  
168 described previously(Conte et al., 2000; Kiem and Schentag, 2008). The  
169 concentration of urea in plasma ( $Urea_{PLASMA}$ ) and PELF ( $Urea_{PELF}$ ) were determined  
170 by using urea test kit (Urea test kit; Sigma Chemical, St Louis, MO, USA) and the  
171 absorbance values measured by using spectrophotometer (Wuhan, China).The final  
172 concentration of danofloxacin in PELF ( $C_{PELF}$ ) was derived from the following  
173 equation:  $C_{PELF} = C_{BAL} \times \left( \frac{Urea_{PLASMA}}{Urea_{PELF}} \right)$ ,  $C_{BAL}$  was diluted concentration of  
174 danofloxacin in PELF determined by HPLC method.

## 175 **2.4.5 Pharmacokinetics-pharmacodynamics modeling**

176 PK-PD parameters were analyzed with a two-compartment model by Winnonlin  
177 v.5.2.1. According to the *ex-vivo* time-killing curve, AUC<sub>24</sub>/MIC (AUIC) of  
178 danofloxacin under different concentrations was calculated by Sigmoid E<sub>max</sub> model  
179  $( E = E_0 - \frac{PD_{max} \times X^\gamma}{X^\gamma + EC_{50}^\gamma} )$ , E is the summary PD endpoint, and E<sub>0</sub> is the effect  
180 representing the value of the PD endpoint without drug treatment (i.e., the value of the  
181 summary endpoint when the PK/PD index is 0). X is one of the three PK/PD indices  
182 as defined above, PD<sub>max</sub> is the maximum effect (in relation to E<sub>0</sub>) indicated by the  
183 plateau where increased exposures result in no further kill. EX<sub>50</sub> is the magnitude of X  
184 that is needed to achieve 50% of PD<sub>max</sub>, and  $\gamma$  is the sigmoidicity factor. The PD target  
185 was determined with *Sigmoid E<sub>max</sub>* equation (Mouton, 2002; Xiao et al., 2015). The  
186 dosage regimen was derived from the concentration-dependent dosage equation  
187  $(Dose = \frac{MIC \times AUIC}{f_u} \times CL/F)$  (Potter et al., 2013; Sidhu et al., 2014; Toutain et al.,  
188 2002). In the equation, the CL was the plasma (total) clearance in days, f<sub>u</sub> was the  
189 free fraction of the drug in plasma (from 0 to 1), and F% was the bioavailability factor  
190 (from 0 to 1).

## 191 **2.4.6 Monte Carlo Simulation to set up CO<sub>PD</sub>**

192 Crystal Ball v7.2.2 was used to perform Monte Carlo simulation. The  
193 distribution of pharmacokinetic parameter AUC<sub>24</sub> was assumed to be log-normal. A  
194 total of 10000 subjects were simulated. The PD target was selected to calculate the  
195 probability of target attainment (PTA). CO<sub>PD</sub> was defined as the MIC at which the  
196 PTA was  $\geq 90\%$ .

## 197 **2.5 Clinical trial and Establishment of CO<sub>CL</sub>**

### 198 **2.5.1 Infection model and Clinical trials**

199 66 healthy weaned piglets (about 20 kg) were divided into 11 groups, 5 groups  
200 were experimental group, 5 groups were negative control group, and 1 group was  
201 blank control group, 6 piglets in each group. The 5 experimental groups and 5  
202 negative control groups were challenged with 5 representative strains H42, H80, H12,  
203 H83 and H17 by intranasal inoculation of  $1 \times 10^{10}$  CFU bacterial suspension twice a



204 day. The blank control group was inoculated with blank TSB broth. The dosage  
205 regimens were recommended by PK-PD therapeutic dosage regimen. After  
206 challenging, these pigs were monitored daily for two weeks.

### 207 **2.5.2 Statistical analysis for establishment of CO<sub>CL</sub>**

208 The probability of cure (POC) was calculated based on the clinical outcomes and  
209 bacteriological prognosis. Clinical outcomes included treatment success and failure,  
210 and each MIC should have a corresponding clinical outcome. Bacteriological  
211 prognosis was to determine the presence or eradication of the bacteria after  
212 administration. The data were analyzed by three different analysis methods.

213 The "Window" approach (Turnidge and Martinez, 2017) included two  
214 parameters: "MaxDiff" and "CAR". "MaxDiff (the method of maximum difference,  
215 MaxDiff)" represents the difference between higher and lower POC at a certain MIC.  
216 "CAR" was based on the clinical outcome and the corresponding MIC distribution.  
217 "CAR" could not be set as the lowest MIC or the highest MIC, if CAR was gradually  
218 increasing with MIC, then the CAR should choose the second small CAR.

219 Nonlinear regression analysis was a new method based on the formula between  
220 EUCAST proposed POC with MIC. Log<sub>2</sub>MIC was independent variable, the POC  
221 was dependent variable. The model with highest correlation coefficient was selected  
222 to simulate its CO<sub>CL</sub>.

223 The classification and regression tree (CART) model (Salford Predictive  
224 Modeler software) was also used for establishment of CO<sub>CL</sub>. MIC was used as the  
225 predictive variable and POC was the target variable. The Gini coefficient  
226 minimization criterion was used to select the MIC node automatically.

## 227 **3 RESULTS**

### 228 **3.1 ECV for danofloxacin against *G. parasuis***

229 The MIC distribution for danofloxacin against *G. parasuis* was shown in Figure  
230 1. The MIC of danofloxacin was ranged from 0.008 to 64 µg/mL. As shown in  
231 figure 1, the MIC distribution was as follows: 0.008 µg/mL (2.88%), 0.015 µg/mL  
232 (1.15%), 0.03 µg/mL (5.19%), 0.06 µg/mL (6.34%), 0.125 µg/mL (7.20%), 0.25

233  $\mu\text{g/mL}$  (5.48%), 0.5  $\mu\text{g/mL}$  (2.88%), 1  $\mu\text{g/mL}$  (8.36%), 2  $\mu\text{g/mL}$  (27.09%), 4  $\mu\text{g/mL}$   
234 (19.60%), and 8  $\mu\text{g/mL}$  (8.65%), 16  $\mu\text{g/mL}$  (4.33%), 32  $\mu\text{g/mL}$  (0.58%), 64  $\mu\text{g/mL}$   
235 (0.29%). The MIC<sub>50</sub> and MIC<sub>90</sub> were 2  $\mu\text{g/mL}$  and 8  $\mu\text{g/mL}$ , respectively.

236 Using ECOFFinder software, the fitted MIC distribution of danofloxacin against  
237 *G. parasuis* was shown in Figure 1. The ECV at 95%, 97.5%, 99%, 99.5% and 99.9%  
238 confidence intervals were 8, 8, 16, 16 and 32  $\mu\text{g/mL}$ , respectively.

## 239 **3.2 CO<sub>PD</sub> for danofloxacin against *G. parasuis***

### 240 **3.2.1 Pathogenic *G. parasuis***

241 18 strains with serotype 5 were selected from ERIC-PCR amplification and  
242 pathogenicity test in mice and five strains (H42, H80, H12, H83 and H17) showed  
243 highest pathogenicity and exhibited different MIC. The strain H80 with MIC close to  
244 MIC<sub>50</sub> was selected for PK-PD study. The 5 respective strains H42 (MIC=16  $\mu\text{g/mL}$ ),  
245 H80 (MIC=4  $\mu\text{g/mL}$ ), H12 (MIC=1  $\mu\text{g/mL}$ ), H83 (MIC=0.125  $\mu\text{g/mL}$ ) and H17  
246 (MIC=0.015  $\mu\text{g/mL}$ ) were selected for clinical trial.

### 247 **3.2.2 Pharmacodynamics of danofloxacin against *G. parasuis***

248 The MIC of danofloxacin in broth and pulmonary epithelial lining fluid (PELF)  
249 were 4  $\mu\text{g/mL}$  and 2  $\mu\text{g/mL}$ , respectively. The MBC in broth and PELF were 8  $\mu\text{g/mL}$   
250 and 4  $\mu\text{g/mL}$ , respectively. The antibacterial activity of danofloxacin in PELF is  
251 stronger than that of in broth. The PELF may contain certain antibodies or  
252 immunological factors or other chemicals which can enhance the antibacterial activity  
253 of danofloxacin.

254 As displayed in Figure 2A/B, the *in vitro* and *ex-vivo* bactericidal effect of  
255 danofloxacin against *G. parasuis* was similar. The lower concentrations ( $\leq$  MIC) of  
256 danofloxacin exhibited similar antibacterial activity to *G. parasuis*. However, when  
257 danofloxacin concentrations were higher than MIC, the inhibitory efficiency gradually  
258 strengthened following the increased drug concentration. The time killing curve  
259 showed that activity of danofloxacin against *G. parasuis* was concentration-dependent.  
260 The Area Under Curve/ Minimum Inhibitory Concentration (AUC/MIC) was selected  
261 as PK-PD parameter.

262 **3.2.3 Sensitivity and accuracy of HPLC method for determination of**  
263 **danofloxacin**

264 The limit of determination (LOD) was 0.01 µg/mL and the limit of quantification  
265 (LOQ) was 0.025 µg/mL in PELF. The LOD was 0.02 µg/mL and the LOQ was 0.05  
266 µg/mL in plasma. Standard curves were linear from 0.05 µg/mL to 5 µg/mL in plasma  
267 ( $R^2 = 0.9994$ ) and 0.025 µg/mL to 2.5 µg/mL in PELF ( $R^2 = 0.9996$ ). The inter-day  
268 variation for determination in plasma and PELF ranged from 1.94% to 2.37% and  
269 1.36% to 2.71%, respectively. The recovery of danofloxacin in plasma and PELF  
270 ranged from 90.79±2.15 to 94.36±1.83 and 91.91±2.49 to 95.73±1.30, respectively.

271 **3.2.4 PK characteristics of danofloxacin in plasma and PELF**

272 The concentration-time curves in plasma and PELF after administration of  
273 danofloxacin at a single dose of 2.5 mg/kg b.w. were shown in Figure 3. Significant  
274 differences were observed between drug concentrations in plasma and in PELF.

275 The simulated pharmacokinetic parameters in plasma and PELF were shown in  
276 Table 1. In plasma, the peak time ( $T_{max}$ ) was  $0.23 \pm 0.07$  h, the peak concentration  
277 ( $C_{max}$ ) was  $0.67 \pm 0.01$  µg/mL, the area under the concentration-time curve (AUC)  
278 was  $4.47 \pm 0.51$  h·µg/mL; in PELF,  $T_{max}$  was  $1.61 \pm 0.15$  h,  $C_{max}$  was  $3.67 \pm 0.25$   
279 µg/mL, AUC was  $24.28 \pm 2.70$  h·µg/mL.

280 Combined with the killing curve in PELF, the PD target (AUIC in *ex-vivo*) under  
281 different efficiency was calculated by Sigmoid  $E_{max}$  equation simulation (Table 2).  
282 The values of AUIC (h) at  $E = 0, -3$  and  $-4$  (bacteriostasis, bactericidal and eradication)  
283 were 12.73, 28.26 and 44.38, respectively.

284 **3.2.5 Monte Carlo Simulation and  $CO_{PD}$**

285 According to the AUC ( $24.28 \pm 2.70$  h·µg/mL) and PD target (12.73, 28.26,  
286 44.38) in PELF, the possibility of target achievement (PTA) at different MIC was  
287 simulated by the Monte Carlo analysis (Table 3). When the PTA in PELF was upon  
288 90%, the  $CO_{PD}$  ( $E=0, -3, -4$ ) for danofloxacin against *G. parasuis* in PELF was 1  
289 µg/mL, 0.5 µg/mL, 0.25 µg/mL, respectively.

290 According to the AUC ( $4.47 \pm 0.51$  h·µg/mL) and PD target (12.73, 28.26, 44.38)  
291 in plasma, the PTA at different MIC was simulated by the Monte Carlo analysis

292 (Table 3). When the PTA in plasma was upon 90%, the CO<sub>PD</sub> (E=0, -3, -4) for  
293 danofloxacin against *G. parasuis* in plasma was 0.25 µg/mL, 0.125 µg/mL, 0.03  
294 µg/mL, respectively.

### 295 **3.3 CO<sub>CL</sub> of danofloxacin against *G. parasuis***

296 The dosage under different efficiency (bacteriostasis, bactericidal and eradication)  
297 were 4.58 mg/kg, 10.32 mg/kg and 15.97 mg/kg. The given dosages were simulated  
298 by Mlxplore software. The modified dosage regimen was 12.49 mg/kg danofloxacin  
299 twice a day. Three methods were used to obtain CO<sub>CL</sub> according to the relationship  
300 between POC and MIC distribution (Table 4).

301 Following "Window" method, the parameters of MaxDiff (0.28) and CAR (0.78)  
302 was corresponding with the MIC of 0.125 µg/mL and 4 µg/mL, respectively. The  
303 selection window for CO<sub>CL</sub> was therefore ranged from 0.125 µg/mL to 4 µg/mL. The  
304 nonlinear regression model was set up as  $y = 80.989 - 7.271x + 0.271x^2 +$   
305  $0.16x^3$  with the correlation coefficient of 0.996. When POC was 90%, the  
306 recommended CO<sub>CL</sub> (MIC) was less than 0.428 µg/mL. The CART regression tree  
307 indicated that the CO<sub>CL</sub> was less than 0.56 µg/mL. Combined with the above three  
308 results, the CO<sub>CL</sub> of danofloxacin against *G. parasuis* was selected as 0.25 µg/mL.

## 309 **4 Discussion**

310 *G. parasuis* is an important pathogen for respiratory infection in swine.  
311 Antimicrobial treatment is the best way to control this pathogen due the vaccine  
312 deficiency. However, antimicrobial resistance in *G. parasuis* had been found in  
313 Germany(Aarestrup et al., 2004), United Kingdom, Spain(de la Fuente et al., 2007)  
314 and China(Wang et al., 2017; Xu et al., 2011; Zhou et al., 2010). To rational use of  
315 antimicrobial agents to control *G. parasuis*, some studies were carried out to establish  
316 the ECVs and/or CO<sub>PD</sub> of marbofloxacin, cefquinome and tilmicosin against *G.*  
317 *parasuis* (Sun et al., 2015; Xiao et al., 2015; Zhang et al., 2016). The efficiency of  
318 danofloxacin on *Actinobacillus pleuropneumoniae* (Lauritzen et al., 2003),  
319 *Pasteurella multocida* (Zeng et al., 2011), and *Mannheimia haemolytica* (Fajt et al.,  
320 2004) was very good. However, the clinical breakpoint of danofloxacin against *G.*

321 *parasuis* had not yet been established.

322 Statistical analysis had been widely used for determination of ECVs.  
323 Turnidge(Turnidge et al., 2006) recommend to use nonlinear regression to analyze the  
324 obtained MIC data and determined the ECVs of various drugs. Kronvall (Kronvall et  
325 al., 2006) used NRI (Normalized Resistance Interpretation) method to analyzed MIC  
326 data obtained by E test for establishment of ECVs. European Commission of  
327 Antimicrobial Susceptibility Testing (EUCAST) recommended ECOFFinder software  
328 on the basis of Turnidge's nolinear regression (Ismail et al., 2018). Van Vliet(Van  
329 Vliet et al., 2017) used NRI and ECOFFinder analysis method to analyze wild type  
330 cutoff values of ampicillin, florfenicol, gentamicin and enrofloxacin. In our study, the  
331 ECV of danofloxacin determined by nonlinear regression analysis was same with that  
332 simulated by ECOFFinder software, suggesting that ECOFFinder software was a  
333 convenient tool for establishment of ECVs. In the present study, the MIC distribution  
334 of danofloxacin against *G. parasuis* appeared three peaks (0.008 µg/mL, 0.125 µg/mL  
335 and 2 µg/mL), suggesting that some *G. parasuis* isolates may be resistant to  
336 danofloxacin. Zhang et al. (Zhang et al., 2013) examined the resistance of 138 *G.*  
337 *parasuis* strains against fluoroquinolone drugs and showed that 60.1% isolates was  
338 resistant to enrofloxacin and 5.8% isolates were resistant to levofloxacin. It suggested  
339 that *G. parasuis* may be also resistant to danofloxacin due to the cross resistance  
340 between fluoroquinolone drugs.

341 The CO<sub>PD</sub> was established based on pharmacokinetic data, MIC distribution and  
342 PK-PD target. Our present study establish the CO<sub>PD</sub> based on the PK data from  
343 healthy animals because of the stability and repeatability of healthy animal model.  
344 Considering the drug concentrations in the target sites were directly correlated with  
345 clinical efficacy, the PK data both in plasma and in PELF were included into our  
346 study(Barbour et al., 2010). Similar with previous studies, our results indicated that  
347 the concentration and AUC of danofloxacin in PELF(in lung) was 4~7 times higher  
348 than that in plasma (Mann and Frame, 1992). The CO<sub>PD</sub> of danofloxacin in PELF was  
349 subsequently higher than the CO<sub>PD</sub> in plasma, indicating that the CO<sub>PD</sub> was different  
350 between in the target issue and in plasma. As danofloxacin can be accumulated at the

351 infection site (lung), the CO<sub>PD</sub> in plasma may not represent the critical value of the  
352 target tissue. It was of great significance to establish the CO<sub>PD</sub> in target tissue and  
353 plasma simultaneously.

354 Previously, Rowan's study exhibited good clinical outcome of danofloxacin in  
355 the treatment of respiratory disease caused by *Haemophilus somnus* and *Pasteurella*  
356 *multocida* in European cattle (Rowan et al., 2004). The clinical data in our study also  
357 showed good clinical outcome of danofloxacin in the treatment of *G. parasuis* in pigs  
358 because the success rate for treatment of *G. parasuis* with MIC of 1µg/mL was still as  
359 high as 83.33%. The CO<sub>CL</sub> was established based on relationship between MIC and  
360 POC under modified therapeutic dosage. Since there was no standard approach for  
361 establishment of CO<sub>CL</sub>, the CO<sub>CL</sub> in the present study was established by the  
362 combination of the three approaches which included the "Window" approach  
363 (Turnidge and Martinez, 2017), the nonlinear regression (Toutain, 2015), and the  
364 CART analysis (Esterly et al., 2012; Zheng et al., 2016). The "Window" approach  
365 was recommended by CLSI (Turnidge and Martinez, 2017). The nonlinear regression  
366 with the formula of  $POC = I / (1 + e^{-a+bf(MIC)})$  was proposed by VetCAST to calculate  
367 the relation between the dependent variable of POC and the independent variable of  
368 MIC (Toutain, 2015). The CART method was previously used to develop clinical  
369 breakpoints of cefepime (Bhat et al., 2007) and this method was recommended by Dr  
370 Cuesta (Cuesta et al., 2010) and Dr. Toutain (Toutain et al., 2017) because the CART  
371 obtained the best statistical results when it was compared with other four supervised  
372 classifiers (J48, the OneR decision rule, the naïve Bayes classifier, and simple logistic  
373 regression).

374 The large difference was observed between three cutoff values with ECV higher  
375 than CO<sub>PD</sub> and CO<sub>CL</sub>. In previous studies, Sweeney's data showed that the MIC  
376 breakpoint of danofloxacin on *Mannheimia haemolytica* and *Pasteurella multocida*  
377 were 1µg/mL (Sweeney et al., 2017), while Yang's data showed that the epidemiologic  
378 cutoff value of danofloxacin *Escherichia coli* was 8 µg/mL (Yang et al., 2019), which  
379 was in accordance with our study. The difference of ECV between different studies  
380 may due to the epidemiological characteristic of different bacterial in different

381 geography. Additionally, previous data showed that some of *G.parasuis* isolates  
382 exhibited decreased sensitivity to fluoroquinolones (Guo et al., 2011). Two peak of  
383 MIC distribution in the present data also suggested that some *G.parasuis* isolates may  
384 be resistant to danofloxacin. The higher MIC of the resistant isolates may contribute  
385 to the higher ECV value and further studies may need to confirm the relationship  
386 between MIC phenotype and resistance genotype.

## 387 **5 Conclusions**

388 This study firstly established the ECV (8µg/mL) at 95% confidence intervals,  
389 CO<sub>PD</sub> in PELF (0.5 µg/mL), CO<sub>PD</sub> in plasma (0.125 µg/mL) and CO<sub>CL</sub> (0.25 µg/mL)  
390 of danofloxacin against *G. parasuis*. Based on CLSI decision tree, final CBP in  
391 plasma and PELF was 0.25µg/mL and 8 µg/mL, respectively. The ECV value was  
392 higher than CO<sub>PD</sub> and CO<sub>CL</sub>, indicating that some *G. parasuis* isolates may be  
393 resistance to danofloxacin.

## 394 **Funding**

395 This work was funded by grants from National key research and development  
396 program (2016YFD0501302/2017YFD0501406), National natural science foundation  
397 of China (31772791), Fundamental Research Funds for the Central Universities  
398 (2662018JC001).

## 399 **Acknowledgments**

400 We appreciated all the participants for their participation and trust and thank  
401 Xiaojuan Xu and Hongyan Yu from State Key Laboratory of Agricultural  
402 Microbiology in Huazhong Agricultural University for freely providing *G. parasuis*  
403 isolates and epidemic materials.

## 404 **Transparency declarations**

405 All authors: none to declare.

## 406 **References**

407 Aarestrup, F.M., Seyfarth, A.M., Angen, O., 2004. Antimicrobial susceptibility of  
408 *Glaesserella parasuis* and *Histophilus somni* from pigs and cattle in Denmark.

409 Veterinary microbiology 101, 143-146.

410 Aliabadi, F.S., Landoni, M.F., Lees, P., 2003. Pharmacokinetics (PK),  
411 pharmacodynamics (PD), and PK-PD integration of danofloxacin in sheep  
412 biological fluids. Antimicrobial agents and chemotherapy 47, 626-635.

413 Barbour, A., Scaglione, F., Derendorf, H., 2010. Class-dependent relevance of tissue  
414 distribution in the interpretation of anti-infective  
415 pharmacokinetic/pharmacodynamic indices. International journal of  
416 antimicrobial agents 35, 431-438.

417 Bhat, S.V., Peleg, A.Y., Lodise, T.P., Jr., Shutt, K.A., Capitano, B., Potoski, B.A.,  
418 Paterson, D.L., 2007. Failure of current cefepime breakpoints to predict  
419 clinical outcomes of bacteremia caused by gram-negative organisms.  
420 Antimicrobial agents and chemotherapy 51, 4390-4395.

421 Cai, X., Chen, H., Blackall, P.J., Yin, Z., Wang, L., Liu, Z., Jin, M., 2005. Serological  
422 characterization of *Glaesserella parasuis* isolates from China. Veterinary  
423 microbiology 111, 231-236.

424 Canton, E., Peman, J., Hervas, D., Iniguez, C., Navarro, D., Echeverria, J.,  
425 Martinez-Alarcon, J., Fontanals, D., Gomila-Sard, B., Buendia, B., Torroba, L.,  
426 Ayats, J., Bratos, A., Sanchez-Reus, F., Fernandez-Natal, I., Grp, F.S., 2012.  
427 Comparison of Three Statistical Methods for Establishing Tentative Wild-Type  
428 Population and Epidemiological Cutoff Values for Echinocandins,  
429 Amphotericin B, Flucytosine, and Six *Candida* Species as Determined by the  
430 Colorimetric Sensititre YeastOne Method. Journal of clinical microbiology 50,  
431 3921-3926.

432 Cherif, K.T., Peris-Vicente, J., Carda-Broch, S., Esteve-Romero, J., 2015. Analysis of  
433 danofloxacin, difloxacin, ciprofloxacin and sarafloxacin in honey using  
434 micellar liquid chromatography and validation according to the 2002/657/EC  
435 decision. Anal Methods-Uk 7, 6165-6172.

436 Conte, J.E., Jr., Golden, J.A., McQuitty, M., Kipps, J., Lin, E.T., Zurlinden, E., 2000.  
437 Effects of AIDS and gender on steady-state plasma and intrapulmonary  
438 ethionamide concentrations. Antimicrobial agents and chemotherapy 44,



- 439 1337-1341.
- 440 Cuesta, I., Bielza, C., Cuenca-Estrella, M., Larranaga, P., Rodriguez-Tudela, J.L.,  
441 2010. Evaluation by data mining techniques of fluconazole breakpoints  
442 established by the Clinical and Laboratory Standards Institute (CLSI) and  
443 comparison with those of the European Committee on Antimicrobial  
444 Susceptibility Testing (EUCAST). *Antimicrobial agents and chemotherapy* 54,  
445 1541-1546.
- 446 de la Fuente, A.J., Tucker, A.W., Navas, J., Blanco, M., Morris, S.J., Gutierrez-Martin,  
447 C.B., 2007. Antimicrobial susceptibility patterns of *Glaesserella parasuis* from  
448 pigs in the United Kingdom and Spain. *Veterinary microbiology* 120, 184-191.
- 449 Drlica, K., Zhao, X., 1997. DNA gyrase, topoisomerase IV, and the 4-quinolones.  
450 *Microbiology and molecular biology reviews* : MMBR 61, 377-392.
- 451 Espinel-Ingroff, A., Turnidge, J., Alastruey-Izquierdo, A., Dannaoui, E., Garcia-Effron,  
452 G., Guinea, J., Kidd, S., Pelaez, T., Sanguinetti, M., Meletiadis, J., Botterel, F.,  
453 Bustamante, B., Chen, Y.C., Chakrabarti, A., Chowdhary, A., Chryssanthou, E.,  
454 Cordoba, S., Gonzalez, G.M., Guarro, J., Johnson, E.M., Kus, J.V., Lass-Flörl,  
455 C., Linares-Sicilia, M.J., Martin-Mazuelos, E., Negri, C.E., Pfaller, M.A.,  
456 Tortorano, A.M., 2018. Posaconazole MIC distributions for *Aspergillus*  
457 *fumigatus* SC by four methods: Impact of Cyp51A mutations on estimation of  
458 epidemiological cutoff values (ECVs/ECOFFs). *Antimicrobial agents and*  
459 *chemotherapy*.
- 460 Esterly, J.S., Wagner, J., McLaughlin, M.M., Postelnick, M.J., Qi, C., Scheetz, M.H.,  
461 2012. Evaluation of Clinical Outcomes in Patients with Bloodstream  
462 Infections Due to Gram-Negative Bacteria According to Carbapenem MIC  
463 Stratification. *Antimicrobial agents and chemotherapy* 56, 4885-4890.
- 464 Fajt, V.R., Apley, M.D., Brogden, K.A., Skogerboe, T.L., Shostrom, V.K., Chin, Y.L.,  
465 2004. Effect of danofloxacin and tilmicosin on body temperatures of beef  
466 calves with pneumonia experimentally induced by inoculation with  
467 *Mannheimia haemolytica*. *Am J Vet Res* 65, 610-615.
- 468 Fernandez-Varon, E., Marin, P., Escudero, E., Vancraeynest, D., Carceles, C.M., 2007.

- 469 Pharmacokinetic-pharmacodynamic integration of danofloxacin after  
470 intravenous, intramuscular and subcutaneous administration to rabbits. *Journal*  
471 *of veterinary pharmacology and therapeutics* 30, 18-24.
- 472 Giguere, S., Huang, R., Malinski, T.J., Dorr, P.M., Tessman, R.K., Somerville, B.A.,  
473 2011. Disposition of gamithromycin in plasma, pulmonary epithelial lining  
474 fluid, bronchoalveolar cells, and lung tissue in cattle. *Am J Vet Res* 72,  
475 326-330.
- 476 Guo, L., Zhang, J., Xu, C., Zhao, Y., Ren, T., Zhang, B., Fan, H., Liao, M., 2011.  
477 Molecular characterization of fluoroquinolone resistance in *Haemophilus*  
478 *parasuis* isolated from pigs in South China. *The Journal of antimicrobial*  
479 *chemotherapy* 66, 539-542.
- 480 Haritova, A.M., Rusenova, N.V., Parvanov, P.R., Lashev, L.D., Fink-Gremmels, J.,  
481 2006. Pharmacokinetic-pharmacodynamic modelling of danofloxacin in  
482 turkeys. *Veterinary research communications* 30, 775-789.
- 483 Ismail, N.A., Omar, S.V., Joseph, L., Govender, N., Blows, L., Ismail, F., Koornhof,  
484 H., Dreyer, A.W., Kaniga, K., Ndjeka, N., 2018. Defining Bedaquiline  
485 Susceptibility, Resistance, Cross-Resistance and Associated Genetic  
486 Determinants: A Retrospective Cohort Study. *EBioMedicine* 28, 136-142.
- 487 Kielstein, P., Rapp-Gabrielson, V.J., 1992. Designation of 15 serovars of *Glaesserella*  
488 *parasuis* on the basis of immunodiffusion using heat-stable antigen extracts.  
489 *Journal of clinical microbiology* 30, 862-865.
- 490 Kiem, S., Schentag, J.J., 2008. Interpretation of antibiotic concentration ratios  
491 measured in epithelial lining fluid. *Antimicrobial agents and chemotherapy* 52,  
492 24-36.
- 493 Kronvall, G., 2010. Normalized Resistance Interpretation as a Tool for Establishing  
494 Epidemiological MIC Susceptibility Breakpoints. *Journal of clinical*  
495 *microbiology* 48, 4445-4452.
- 496 Kronvall, G., Karlsson, I., Walder, M., Sorberg, M., Nilsson, L.E., 2006.  
497 Epidemiological MIC cut-off values for tigecycline calculated from Etest MIC  
498 values using normalized resistance interpretation. *The Journal of antimicrobial*

499 chemotherapy 57, 498-505.

500 Lauritzen, B., Lykkesfeldt, J., Friis, C., 2003. Evaluation of a single dose versus a  
501 divided dose regimen of danofloxacin in treatment of *Actinobacillus*  
502 *pleuropneumoniae* infection in pigs. *Research in veterinary science* 74,  
503 271-277.

504 Mann, D.D., Frame, G.M., 1992. Pharmacokinetic study of danofloxacin in cattle and  
505 swine. *Am J Vet Res* 53, 1022-1026.

506 Mouton, J.W., 2002. Breakpoints: current practice and future perspectives.  
507 *International journal of antimicrobial agents* 19, 323-331.

508 Nedbalcova, K., Zouharova, M., Sperling, D., 2017. The determination of minimum  
509 inhibitory concentrations of selected antimicrobials for porcine *Glaesserella*  
510 *parasuis* isolates from the Czech Republic. *Acta Vet Brno* 86, 175-181.

511 Oliveira, S., Galina, L., Pijoan, C., 2001. Development of a PCR test to diagnose  
512 *Glaesserella parasuis* infections. *Journal of veterinary diagnostic investigation :*  
513 *official publication of the American Association of Veterinary Laboratory*  
514 *Diagnosticians, Inc* 13, 495-501.

515 Oliveira, S., Pijoan, C., 2004. *Glaesserella parasuis*: new trends on diagnosis,  
516 epidemiology and control. *Veterinary microbiology* 99, 1-12.

517 Potter, T., Illambas, J., Pelligand, L., Rycroft, A., Lees, P., 2013. Pharmacokinetic and  
518 pharmacodynamic integration and modelling of marbofloxacin in calves for  
519 *Mannheimia haemolytica* and *Pasteurella multocida*. *Veterinary journal* 195,  
520 53-58.

521 Rafiee, M., Bara, M., Stephens, C.P., Blackall, P.J., 2000. Application of ERIC-PCR  
522 for the comparison of isolates of *Glaesserella parasuis*. *Australian veterinary*  
523 *journal* 78, 846-849.

524 Rey, J.E., Laffont, C.M., Croubels, S., De Backer, P., Zemirline, C., Bousquet, E.,  
525 Guyonnet, J., Ferran, A.A., Bousquet-Melou, A., Toutain, P.L., 2014. Use of  
526 Monte Carlo simulation to determine pharmacodynamic cutoffs of amoxicillin  
527 to establish a breakpoint for antimicrobial susceptibility testing in pigs. *Am J*  
528 *Vet Res* 75, 124-131.

- 529 Rowan, T.G., Sarasola, P., Sunderland, S.J., Giles, C.J., Smith, D.G., 2004. Efficacy  
530 of danofloxacin in the treatment of respiratory disease in European cattle. The  
531 Veterinary record 154, 585-589.
- 532 Sidhu, P., Rassouli, A., Illambas, J., Potter, T., Pelligand, L., Rycroft, A., Lees, P.,  
533 2014. Pharmacokinetic-pharmacodynamic integration and modelling of  
534 florfenicol in calves. Journal of veterinary pharmacology and therapeutics 37,  
535 231-242.
- 536 Sun, J., Xiao, X., Huang, R.J., Yang, T., Chen, Y., Fang, X., Huang, T., Zhou, Y.F., Liu,  
537 Y.H., 2015. In vitro Dynamic Pharmacokinetic/Pharmacodynamic (PK/PD)  
538 study and COPD of Marbofloxacin against *Glaesserella parasuis*. BMC Vet Res  
539 11, 293.
- 540 Sweeney, M.T., Papich, M.G., Watts, J.L., 2017. New interpretive criteria for  
541 danofloxacin antibacterial susceptibility testing against *Mannheimia*  
542 *haemolytica* and *Pasteurella multocida* associated with bovine respiratory  
543 disease. Journal of veterinary diagnostic investigation : official publication of  
544 the American Association of Veterinary Laboratory Diagnosticians, Inc 29,  
545 224-227.
- 546 Toutain, P.L. 2015. Setting clinical breakpoint Methodological aspects (France,  
547 European Committee on Antimicrobial Susceptibility Testing).
- 548 Toutain, P.L., Bousquet-Melou, A., Damborg, P., Ferran, A.A., Mevius, D., Pelligand,  
549 L., Veldman, K.T., Lees, P., 2017. En Route towards European Clinical  
550 Breakpoints for Veterinary Antimicrobial Susceptibility Testing: A Position  
551 Paper Explaining the VetCAST Approach. Front Microbiol 8.
- 552 Toutain, P.L., Del Castillo, J.R.E., Bousquet-Melou, A., 2002. The  
553 pharmacokinetic-pharmacodynamic approach to a rational dosage regimen for  
554 antibiotics. Research in veterinary science 73, 105-114.
- 555 Turnidge, J., Kahlmeter, G., Kronvall, G., 2006. Statistical characterisation of  
556 bacterial wild-type MIC value distributions and the determination of  
557 epidemiological cut-off values. Clin Microbiol Infect 12, 418-425.
- 558 Turnidge, J.D., Martinez, M.N., 2017. Proposed method for estimating clinical cut-off

- 559 (COCL) values: An attempt to address challenges encountered when setting  
560 clinical breakpoints for veterinary antimicrobial agents. *Veterinary journal* 228,  
561 33-37.
- 562 Van Vliet, D., Loch, T.P., Smith, P., Faisal, M., 2017. Antimicrobial Susceptibilities of  
563 *Flavobacterium psychrophilum* Isolates from the Great Lakes Basin, Michigan.  
564 *Microb Drug Resist* 23, 791-798.
- 565 Versalovic, J., Koeth, T., Lupski, J.R., 1991. Distribution of repetitive DNA  
566 sequences in eubacteria and application to fingerprinting of bacterial genomes.  
567 *Nucleic acids research* 19, 6823-6831.
- 568 Wang, Z.H., Zhao, Q., Wei, H.L., Wen, X.T., Cao, S.J., Huang, X.B., Wu, R., Yan,  
569 Q.G., Huang, Y., Wen, Y.P., 2017. Prevalence and seroepidemiology of  
570 *Glaesserella parasuis* in Sichuan province, China. *Peerj* 5.
- 571 Xiao, X., Sun, J., Chen, Y., Huang, R.J., Huang, T., Qiao, G.G., Zhou, Y.F., Liu, Y.H.,  
572 2015. In vitro dynamic pharmacokinetic/pharmacodynamic(PK/PD) modeling  
573 and PK/PD cutoff of cefquinome against *Glaesserella parasuis*. *Bmc Vet Res*  
574 11, 33.
- 575 Xu, C., Zhang, J., Zhao, Z., Guo, L., Zhang, B., Feng, S., Zhang, L., Liao, M., 2011.  
576 Antimicrobial susceptibility and PFGE genotyping of *Glaesserella parasuis*  
577 isolates from pigs in South China (2008-2010). *The Journal of veterinary*  
578 *medical science / the Japanese Society of Veterinary Science* 73, 1061-1065.
- 579 Yang, Y., Zhang, Y., Li, J., Cheng, P., Xiao, T., Muhammad, I., Yu, H., Liu, R., Zhang,  
580 X., 2019. Susceptibility breakpoint for Danofloxacin against swine  
581 *Escherichia coli*. *Bmc Vet Res* 15, 51.
- 582 Yu, J., Zhang, Y.Y., Du, Y.J., Li, J., Huang, B.H., Sun, W.B., Cong, X.Y., Peng, J., Ren,  
583 S.F., Gou, L.H., Shi, J.L., Chen, Z., Chen, L., Li, J.D., Yang, J., Wu, J.Q.,  
584 Wang, J.B., 2016. The BALB/c mouse infection model for improving the  
585 *Glaesserella parasuis* serotyping scheme. *Research in veterinary science* 109,  
586 166-168.
- 587 Zeng, Z., Deng, G., Shen, X., Rizwan-Ul-Haq, M., Zeng, D., Ding, H., 2011. Plasma  
588 and tissue pharmacokinetics of danofloxacin in healthy and in experimentally

589 infected chickens with *Pasteurella multocida*. *Journal of veterinary*  
590 *pharmacology and therapeutics* 34, 101-104.

591 Zhang, L., Li, Y., Dai, K., Wen, X., Wu, R., Huang, X., Jin, J., Xu, K., Yan, Q., Huang,  
592 Y., Ma, X., Wen, Y., Cao, S., 2015. Establishment of a Successive Markerless  
593 Mutation System in *Glaesserella parasuis* through Natural Transformation.  
594 *PloS one* 10, e0127393.

595 Zhang, P., Hao, H., Li, J., Ahmad, I., Cheng, G., Chen, D., Tao, Y., Huang, L., Wang,  
596 Y., Dai, M., Liu, Z., Yuan, Z., 2016. The Epidemiologic and  
597 Pharmacodynamic Cutoff Values of Tilmicosin against *Glaesserella parasuis*.  
598 *Front Microbiol* 7, 385.

599 Zhang, Q., Zhou, M., Song, D., Zhao, J., Zhang, A., Jin, M., 2013. Molecular  
600 characterisation of resistance to fluoroquinolones in *Glaesserella parasuis*  
601 isolated from China. *International journal of antimicrobial agents* 42, 87-89.

602 Zheng, X., Zheng, R., Hu, Y., Werngren, J., Forsman, L.D., Mansjo, M., Xu, B.,  
603 Hoffner, S., 2016. Determination of MIC Breakpoints for Second-Line Drugs  
604 Associated with Clinical Outcomes in Multidrug-Resistant Tuberculosis  
605 Treatment in China. *Antimicrobial agents and chemotherapy* 60, 4786-4792.

606 Zhou, X., Xu, X., Zhao, Y., Chen, P., Zhang, X., Chen, H., Cai, X., 2010. Distribution  
607 of antimicrobial resistance among different serovars of *Glaesserella parasuis*  
608 isolates. *Veterinary microbiology* 141, 168-173.

609

610 **Tables**

611 Table 1 PK parameters of danofloxacin in plasma and PELF (n=6)

| Parameters        | Unit    | Plasma       | PELF          |
|-------------------|---------|--------------|---------------|
| A                 | µg/mL   | 0.43±0.16    | 6.50±2.21     |
| B                 | µg/mL   | 0.37±0.18    | 0.54±0.40     |
| α                 | 1/h     | 0.40±0.13    | 0.29±0.04     |
| β                 | 1/h     | 0.14±0.02    | 0.06±0.02     |
| T <sub>1/2α</sub> | h       | 1.78±0.76    | 2.39±0.3      |
| T <sub>1/2β</sub> | h       | 4.96±0.47    | 10.46±0.76    |
| T <sub>max</sub>  | h       | 0.23±0.07    | 1.61±0.15     |
| AUC <sub>24</sub> | h·µg/mL | 4.47±0.51    | 24.28±2.70    |
| C <sub>max</sub>  | µg/mL   | 0.67±0.01    | 3.67±0.25     |
| CL/F              | mL/h/kg | 571.49±53.02 | 89.98±9.7     |
| Vd/F              | mL/kg   | 435.04±45.43 | 3531.73±49.12 |

612

613

614

615

Table 2 PD target of danofloxacin against *G. parasuis*

| Time (h) | $C_{vivo}$ | $(AUC)_{ex}$ | E (logCFU/mL) | Calculated PD target |
|----------|------------|--------------|---------------|----------------------|
| 0        | 0.00       | 0.00         | 3.62          | $E_0=3.62$           |
| 0.5      | 2.11±0.37  | 25.34±4.39   | -3.12         | $PD_{max}=8.67$      |
| 1        | 3.13±0.35  | 37.54±4.21   | -5.05         |                      |
| 1.5      | 3.89±0.11  | 46.70±1.37   | -5.05         | $EX_{50}=15.24$      |
| 2        | 3.51±0.33  | 42.15±3.96   | -5.05         | $\gamma=1.85$        |
| 3        | 3.02±0.21  | 36.28±2.53   | -5.05         |                      |
| 4        | 2.23±0.25  | 26.81±2.95   | -3.59         | $AUC(E=0)=12.73$     |
| 6        | 1.56±0.45  | 18.72±5.39   | -1.84         | $AUC(E=-3)=28.68$    |
| 8        | 1.02±0.23  | 12.28±2.75   | -1.07         | $AUC(E=-4)=44.38$    |
| 10       | 0.69±0.19  | 8.31±2.33    | 1.49          |                      |
| 12       | 0.38±0.16  | 4.56±1.90    | 3.24          |                      |
| 24       | 0.27±0.03  | 3.24±0.31    | 3.34          |                      |

616 Note:  $C_{vivo}$  is the concentration of danofloxacin in PELF;  $(AUC)_{ex}$  is selected PK-PD parameters;  
617 a represented the bacterial colonies lower than the limit of detection (10CFU/mL).

618



619 Table 3 PTA of danofloxacin against *G. parasuis* at different MIC in PELF and plasma

| MIC<br>( $\mu\text{g/mL}$ ) | PELF          |                |                | Plasma        |                |                |
|-----------------------------|---------------|----------------|----------------|---------------|----------------|----------------|
|                             | PTA%<br>(E=0) | PTA%<br>(E=-3) | PTA%<br>(E=-4) | PTA%<br>(E=0) | PTA%<br>(E=-3) | PTA%<br>(E=-4) |
| 0.015                       | 100           | 100            | 100            | 100           | 100            | 100            |
| 0.03                        | 100           | 100            | 100            | 100           | 100            | 100            |
| 0.125                       | 100           | 100            | 100            | 100           | 98.46          | 1.24           |
| 0.25                        | 100           | 100            | 100            | 99.94         | 0              | 0              |
| 0.5                         | 100           | 100            | 80.97          | 0.04          | 0              | 0              |
| 1                           | 100           | 3.81           | 0              | 0             | 0              | 0              |
| 2                           | 29.95         | 0              | 0              | 0             | 0              | 0              |
| 4                           | 0             | 0              | 0              | 0             | 0              | 0              |
| 8                           | 0             | 0              | 0              | 0             | 0              | 0              |
| 16                          | 0             | 0              | 0              | 0             | 0              | 0              |
| 32                          | 0             | 0              | 0              | 0             | 0              | 0              |

620

621

622 Table 4 POC and “WindowW” for danofloxacin against *G. parasuis* at different MIC

| Strain number | Strain group | MIC (µg/mL) | Success (%) | Eradication (%) | POC (%) | MaxDiff | CAR  |
|---------------|--------------|-------------|-------------|-----------------|---------|---------|------|
| H42           | Test         | 16          | 67.7        | 67.7            | 67.7    | 0       | 0.70 |
|               | Controll     |             | 16.7        | 0               | 0       |         |      |
| H80           | Test         | 4           | 67.7        | 83.3            | 67.7    | 0       | 0.79 |
|               | Controll     |             | 33.3        | 16.7            | 33.3    |         |      |
| H12           | Test         | 1           | 83.3        | 83.3            | 83.3    | 0.167   | 0.93 |
|               | Controll     |             | 33.3        | 16.7            | 33.3    |         |      |
| H83           | Test         | 0.125       | 100         | 100             | 100     | 0.28    | 1    |
|               | Controll     |             | 33.3        | 16.7            | 16.7    |         |      |
| H17           | Test         | 0.015       | 100         | 100             | 100     | 0.21    | 1    |
|               | Controll     |             | 50          | 33.3            | 33.3    |         |      |

623 **Figures and Figure legends**

624

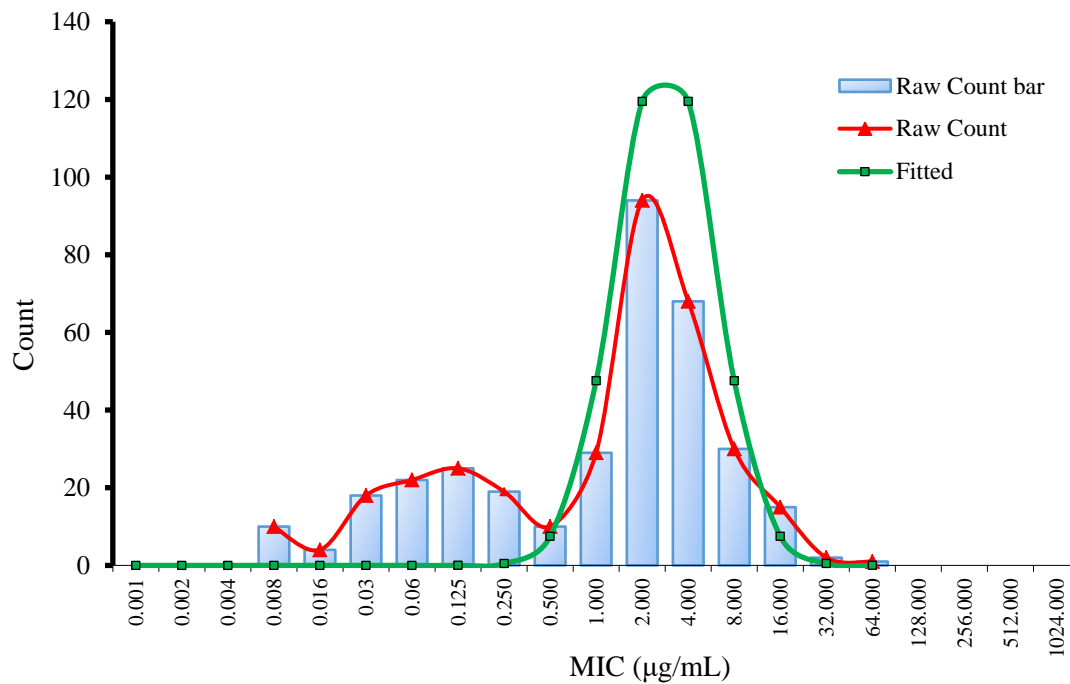

625

626

627 Figure1 Nonlinear regression of MIC distribution for danofloxacin against *G. parasuis*

628

629

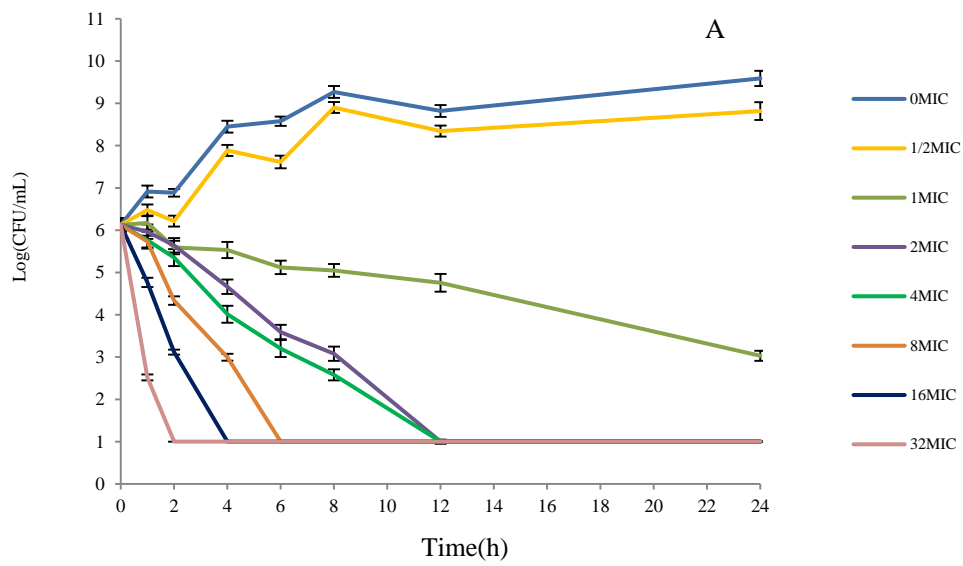

630

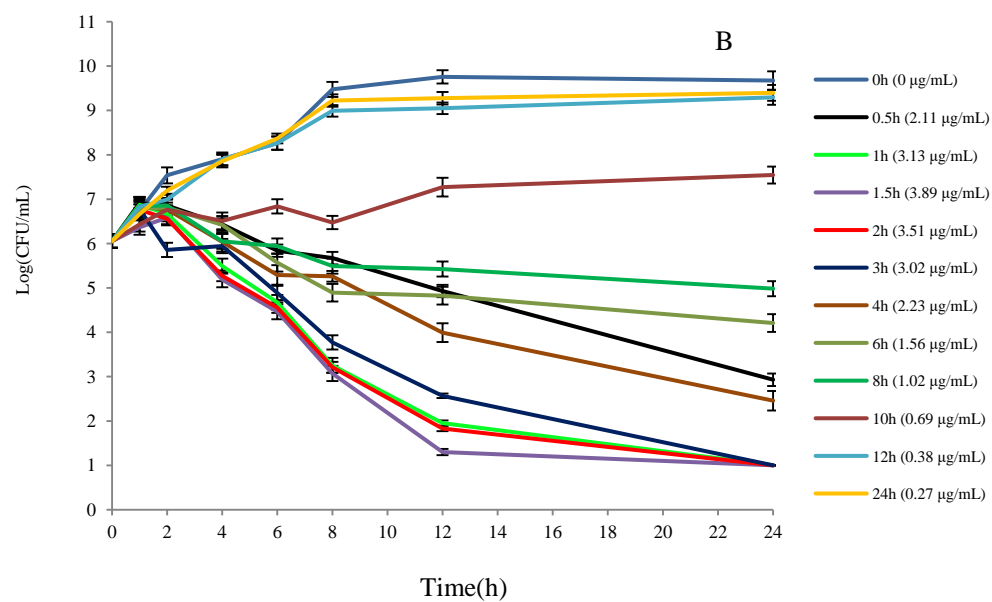

631

632 Figure 2A/B The killing curve of *G. parasuis* in PELF and plasma

633 Note: Figure A was the killing curve of *G. parasuis* in TSB broth, Figure B was killing curve of

634 *G. parasuis* in PELF.

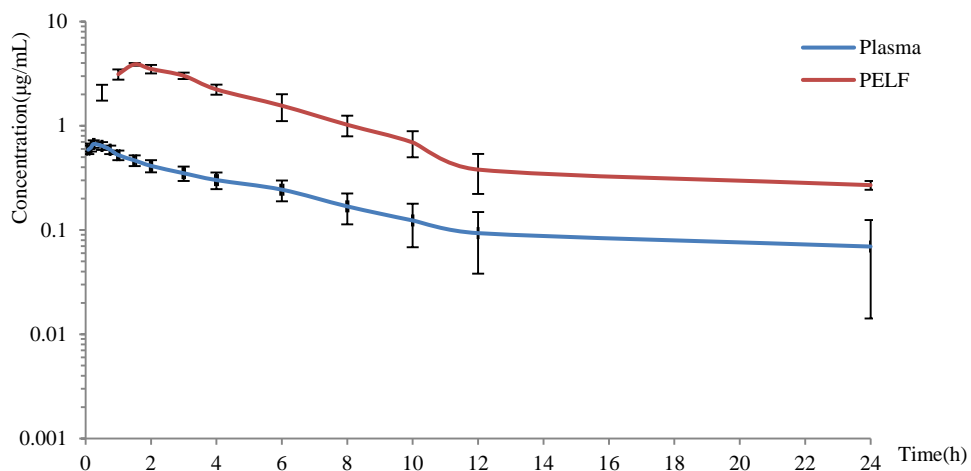

635

636

Figure 3 Mean concentration versus time curves for danofloxacin in PELF and plasma

637

638 **Supplementary materials**

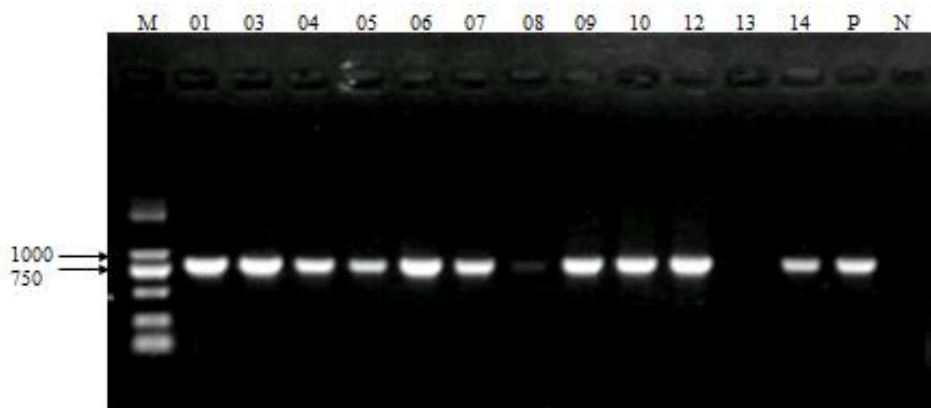

639

640

Figure 1 Amplification of *G. parasuis* 16S rRNA with PCR

641 Lane M: DL-2000 DNA Marker; Lane P: positive control; Lane N: Negative control; Lane2-13:  
642 Samples to be amplified.

643

644

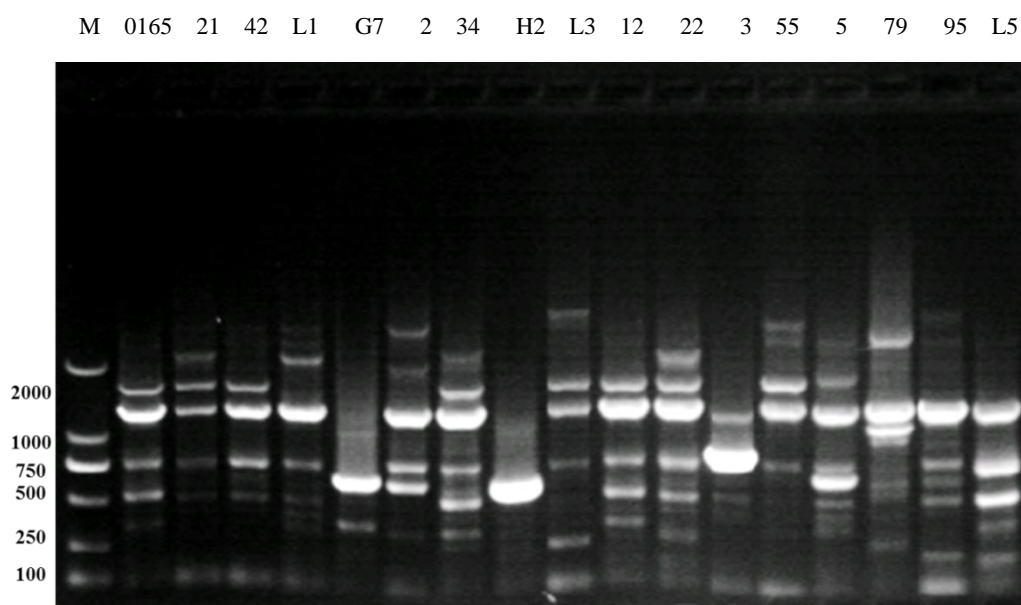

645

646

Figure 2 Results of ERIC-PCR for *G. parasuis*

647 Lane M: DL-2000 DNA Marker; Lane 2: SH0165 strain; Lane 17: Negative control; Lane 3-16:  
648 Samples to be amplified

649

650

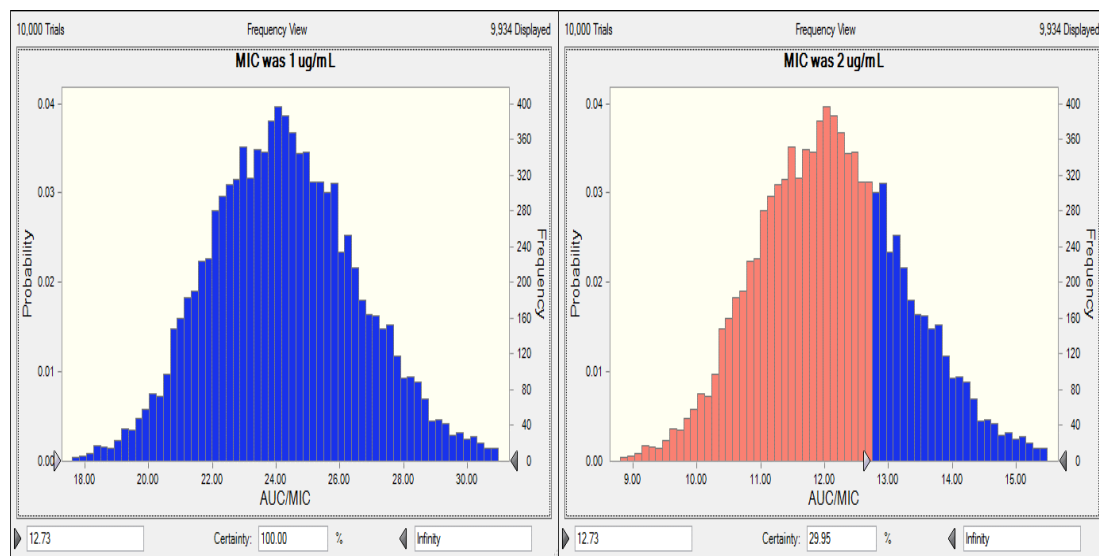

651

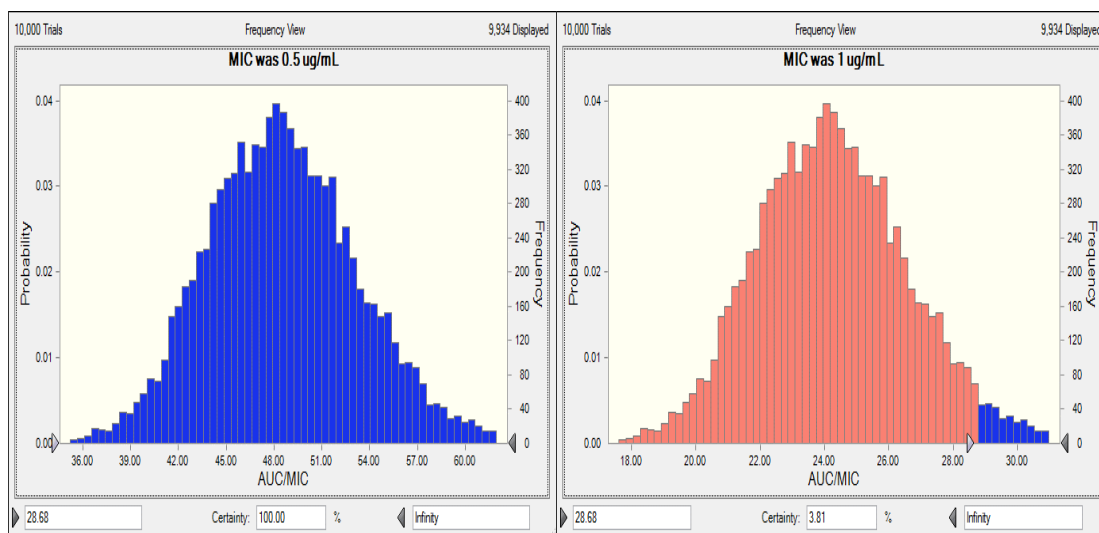

652

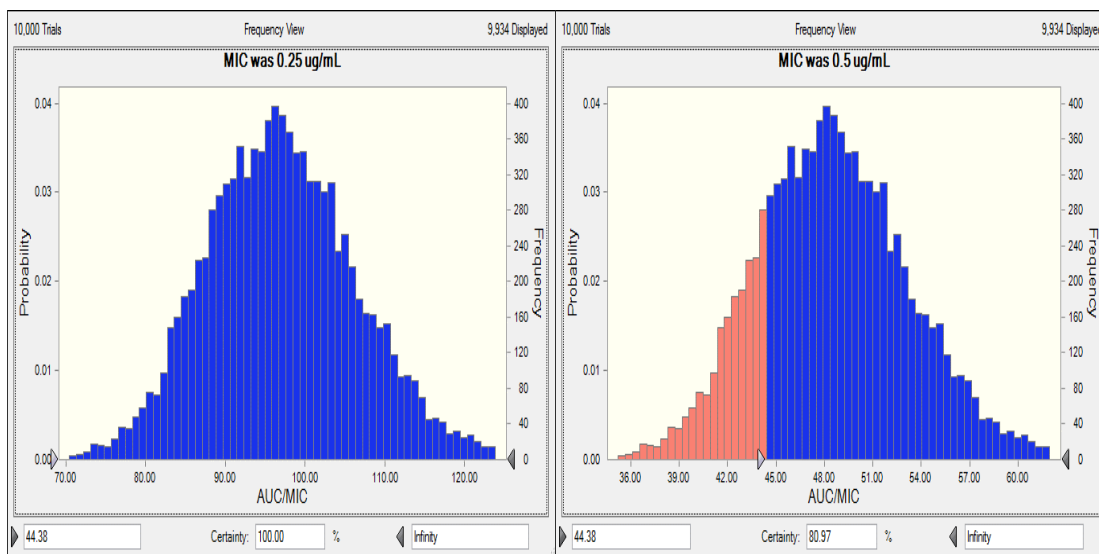

653

Figure 3 PTA of danofloxacin against *G. parasuis* in PELF

654

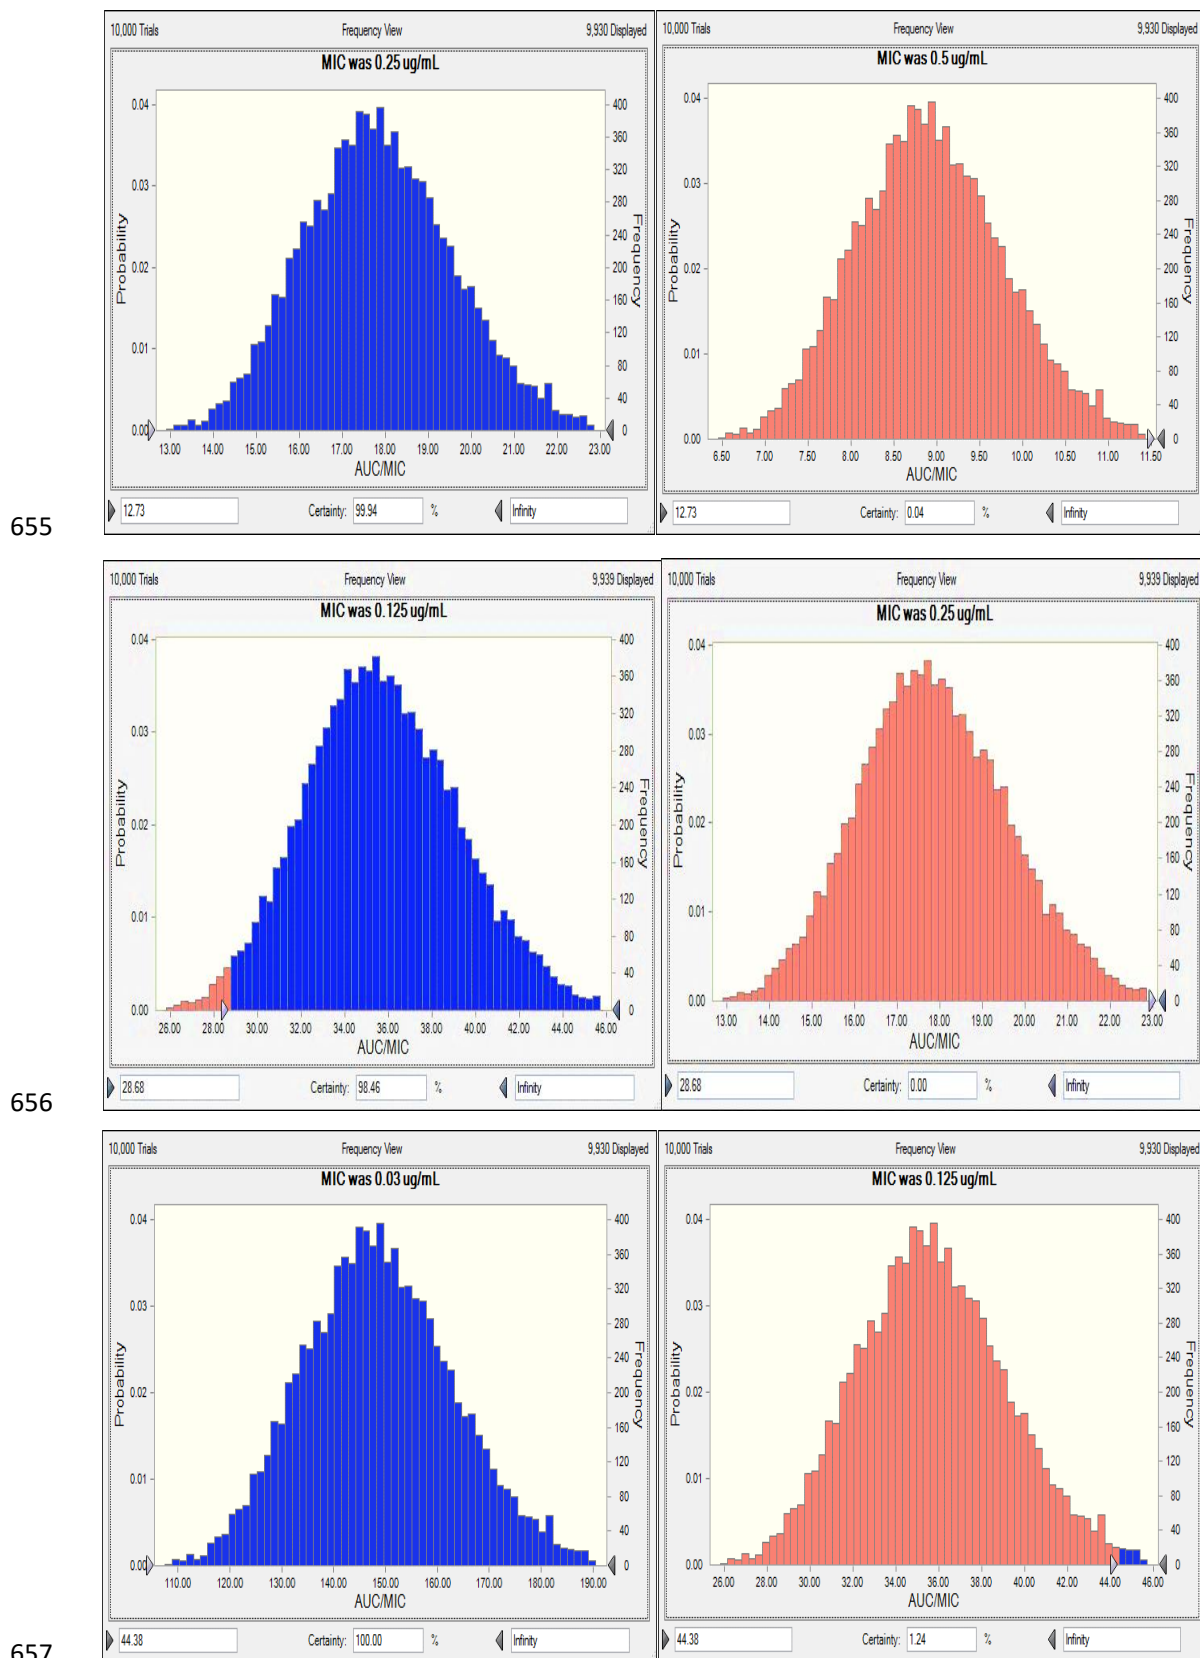

655

656

657

658

659

Figure 4 PTA of danofloxacin against *G. parasuis* in plasma



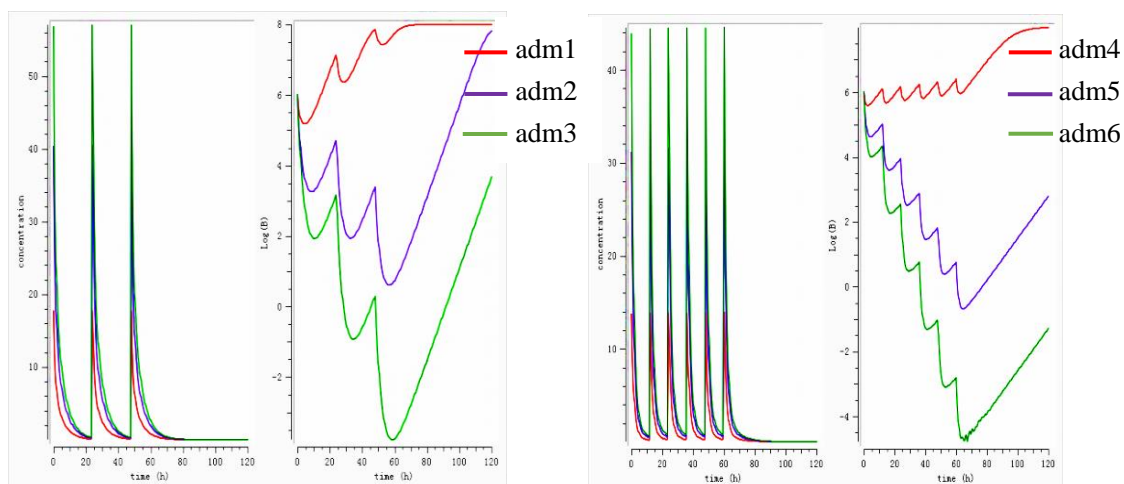

660

661

Figure 5 Forecast growth of *G. parasuis* at different dosage regimens

662 Note: adm 1: prevent dosage: 4.58 mg/kg once daily; adm 2: therapeutic dosage: 10.32 mg/kg  
 663 once daily; adm 3: eradicate dosage: 15.97 mg/kg once daily; adm 4: prevent dosage: 4.58 mg/kg  
 664 twice daily; adm 5: therapeutic dosage: 10.32 mg/kg twice daily; adm 6: eradicate dosage: 15.97  
 665 mg/kg twice daily.

666

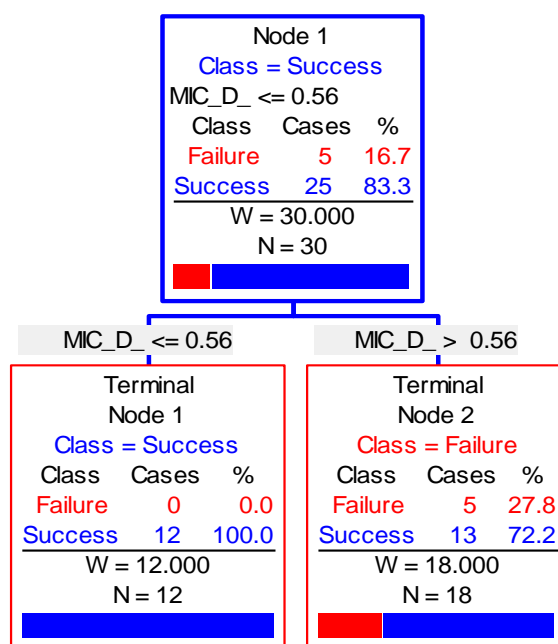

667

668

Figure 6 CART tree showing values of clinical outcome

669

670

671

672

673

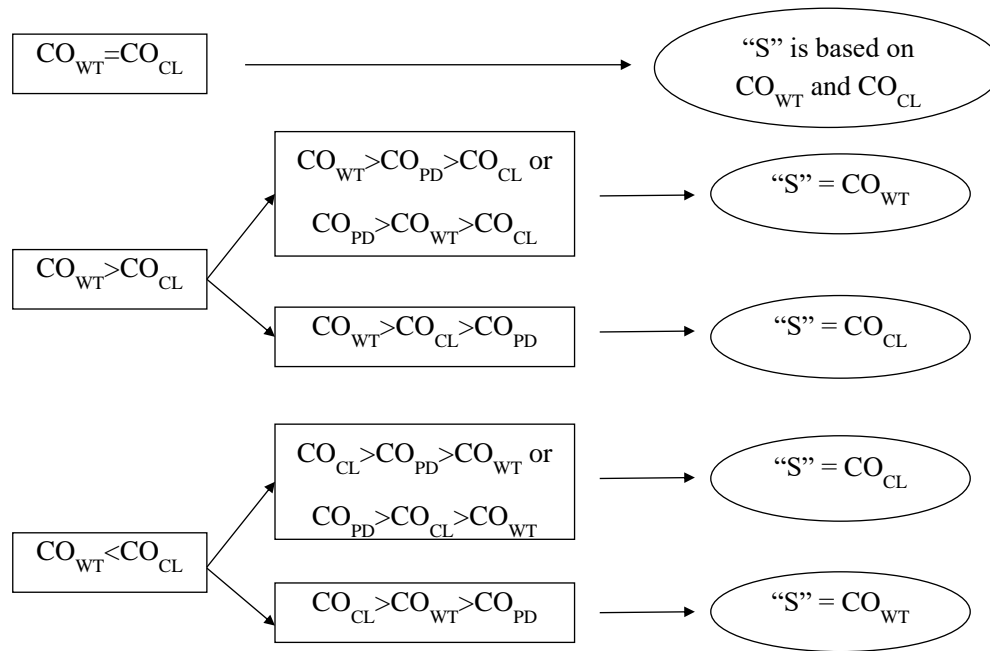

674

675

Figure 7 Susceptibility breakpoint decision tree

676

677

Table 1 Epidemiological MIC for danofloxacin against *G. parasuis*

| Parameters                     | Value                |
|--------------------------------|----------------------|
| MIC range                      | 0.015 µg/mL~32 µg/mL |
| MIC <sub>50</sub>              | 2 µg/mL              |
| MIC <sub>90</sub>              | 8 µg/mL              |
| Selected Subset                | ≤ 64 µg/mL           |
| Modal MIC                      | 2 µg/mL              |
| Log <sub>2</sub> MIC Mode      | 1                    |
| Max Log <sub>2</sub> MIC       | 6                    |
| Selected Log <sub>2</sub> Mean | 1                    |
| Selected Log <sub>2</sub> SD   | 1                    |
| 95.0% Subset ECOFFs            | 8 µg/mL              |
| 97.5% Subset ECOFFs            | 8 µg/mL              |
| 99.0% Subset ECOFFs            | 16 µg/mL             |
| 99.5% Subset ECOFFs            | 16 µg/mL             |
| 99.9% Subset ECOFFs            | 32 µg/mL             |

678

Note: Selected Subset was the optimal fitting range by nonlinear regression; Modal MIC was the

679

highest MIC distribution.

680

681

682

683 Table 2 Concentrations of danfloxacin in plasma and PELF at various time points (n=6)

| Time points (h) | Plasma    | PELF      |
|-----------------|-----------|-----------|
| 0.08            | 0.59±0.04 |           |
| 0.167           | 0.62±0.02 |           |
| 0.25            | 0.67±0.02 |           |
| 0.5             | 0.64±0.02 | 2.11±0.37 |
| 0.75            | 0.59±0.02 |           |
| 1               | 0.52±0.04 | 3.13±0.35 |
| 1.5             | 0.47±0.05 | 3.89±0.11 |
| 2               | 0.41±0.04 | 3.51±0.33 |
| 3               | 0.35±0.04 | 3.02±0.21 |
| 4               | 0.30±0.05 | 2.23±0.25 |
| 6               | 0.24±0.05 | 1.56±0.45 |
| 8               | 0.17±0.03 | 1.02±0.23 |
| 10              | 0.12±0.02 | 0.69±0.19 |
| 12              | 0.09±0.01 | 0.38±0.16 |
| 24              | 0.07±0.02 | 0.27±0.03 |
| 36              | ND        | ND        |
| 48              | ND        | ND        |

684 Note: "ND": not detected.

685
